# Supplementary material for: Dental pulp stem cell‑derived extracellular vesicles loaded with hydrogels promote osteogenesis in rats with alveolar bone defects
Source: PubMed Central journal article supplement — Mol Med Rep. 2024 Nov 13;31(1):29. doi: 10.3892/mmr.2024.13393 (PMC11582518; doi:10.3892/mmr.2024.13393), 2024-11-13

Figure S1. DPSC-EVs increase the mRNA level of ALP, BSP, RUNX2, TGF- $\beta$ 1, TGFR1, Smad2/3, MAPK and ERK. HERS cells were cocultured with DPSC-EVs, and the mRNA levels of (A) ALP, (B) RUNX2, (C) BSP, (D) TGF- $\beta$ 1, (E) TGFR1, (F) Smad3, (G) ERK and (H) MAPK in the HERS cells were detected by RT-qPCR. The data from three independent experiments are presented as the mean  $\pm$  SD; \*\*\* $P$ <0.001 DPSC, dental pulp stem cell; EV, extracellular vesicle; HERS, Hertwig's epithelial root sheath; BSP, bone sialoprotein; RUNX2, runt-related transcription factor 2; ALP, alkaline phosphatase.

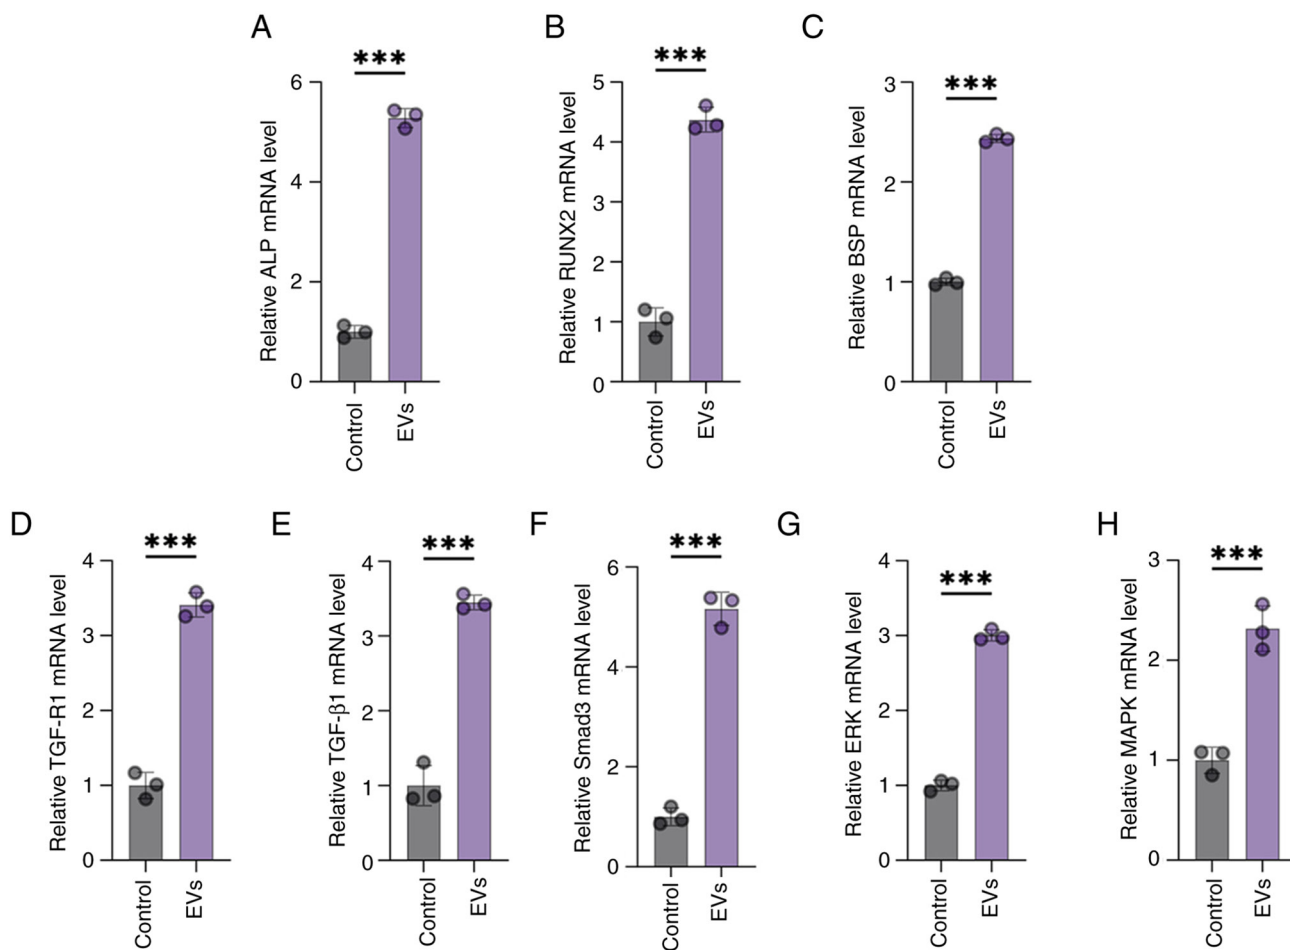

Figure S2. DPSC-EVs increase the mRNA level of TGF- $\beta$ 1, TGFR1, Smad, MAPK and ERK by TGF- $\beta$ 1 signaling. mRNA level of (A) TGF- $\beta$ 1, (B) TGFR1, (C) Smad, (D) MAPK and (E) ERK in the HERS cells were detected by RT-qPCR in the DPSC-EVs and in the DPSC-EVs + TGF- $\beta$ 1i group. The data from three independent experiments are presented as the mean  $\pm$  SD; \* $P$ <0.05, \*\* $P$ <0.01, \*\*\* $P$ <0.001. DPSC, dental pulp stem cell; EV, extracellular vesicle; HERS, Hertwig's epithelial root sheath.

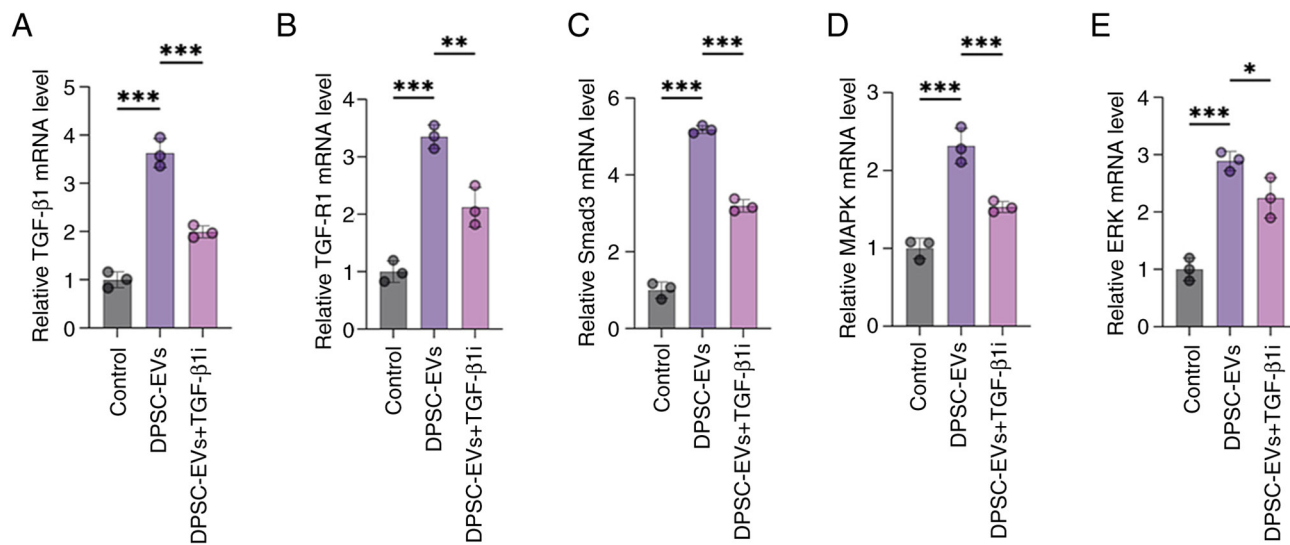

Figure S3. DPSC-EV-loaded hydrogels promote the mRNA levels of ALP, BSP, RUNX2, TGF- $\beta$ 1 and Smad in rats with alveolar bone defects. mRNA level of (A) ALP, (B) BSP, (C) RUNX2, (D) TGF- $\beta$ 1 and (E) Smad3 in the HERS cells were detected by RT-qPCR. The data from three independent experiments are presented as the mean  $\pm$  SD; \*\* $P$ <0.01, \*\*\* $P$ <0.001. DPSC, dental pulp stem cell; EV, extracellular vesicle; HERS, Hertwig's epithelial root sheath; BSP, bone sialoprotein; RUNX2, runt-related transcription factor 2; ALP, alkaline phosphatase.

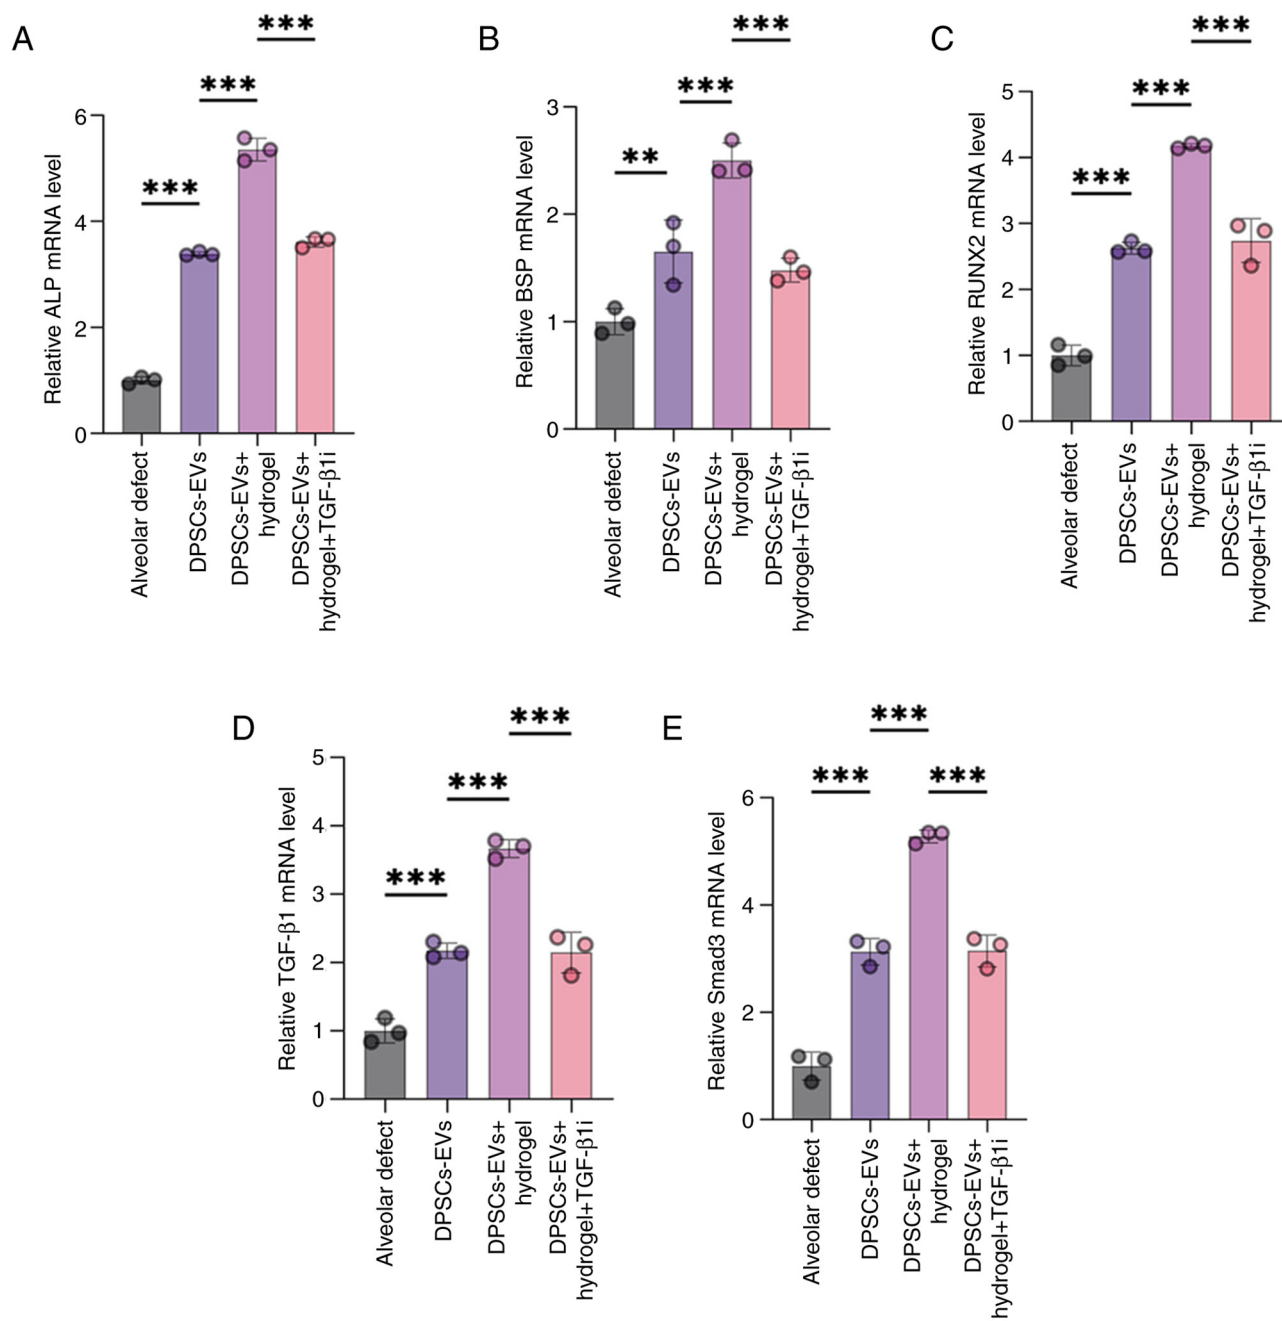

Supplement: Supplementary_Data.pdf [file Supplementary_Data.pdf]
